# Supplementary material for: Methodological Aspects of the Potential Use of Dendrochronological Techniques When Analyzing the Long-Term Impact of Tourism on Protected Areas
Source: PLoS One. 2015 Sep 1;10(9):e0136830. doi: 10.1371/journal.pone.0136830 (PMC4556516; doi:10.1371/journal.pone.0136830)
Supplement: S1 File — The file consist two tables. Table "RD" includes data about tree ring width [mm]. The rows represents particular years, variables trees described according following scheme: "StudyPlot_Zone_TreeNr" where: K-"Kopieniec"," MW-"Murowaniec-Waksmundzka"; "T"- trampling zone; "C"- control zone. Empty variables represent flawed trees. Table "Norm" includes normalized average annual increments for trees growing under trampling impact and at the reference area, for both analyzed study plots. (XLS) [file pone.0136830.s001.xls]

## Sheet: RD
year	K_T_1	K_T_2	K_T_3	K_T_4	K_T_5	K_T_6	K_T_7	K_T_8	K_T_9	K_T_10	K_T_11	K_T_12	K_T_13	K_T_14	K_T_15	K_T_16	K_T_17	K_T_18	K_T_19	K_T_20	K_C_1	K_C_2	K_C_3	K_C_4	K_C_5	K_C_6	K_C_7	K_C_8	K_C_9	K_C_10	K_C_11	K_C_12	K_C_13	K_C_14	K_C_15	K_C_16	K_C_17	K_C_18	K_C_19	K_C_20	MW_T_1	MW_T_2	MW_T_3	MW_T_4	MW_T_5	MW_T_6	MW_T_7	MW_T_8	MW_T_9
2007	0.63	0.241	2.201	1.01	0.945	0.63	0.56	0.514	0.32	0.331	0.57	0.149	0.311	0.272	0.31	0.202	0.32	0.515	0.251		1.397	0.714		0.973	0.151	1.011	0.972	1.05	1.18	1.403	0.992	1.383	0.64	1.26	1.272	0.55	2.099	1.186	0.471	0.893	0.89			0.38	0.314	0.621		0.34
2006	0.449	0.391	2.672	1.23	1.48	0.8	0.771	0.41	0.481	0.502	0.68	0.348	0.541	0.34	0.461	0.296	0.39	0.539	0.331		1.778	0.983		0.641	0.181	1.263	1.016	0.681	2.2	1.745	1.303	1.812	0.802	1.441	2.26	0.771	2.763	1.446	0.623	0.974	0.93			0.321	0.253	0.817		0.37
2005	0.851	0.354	1.912	1.013	1.531	0.89	0.601	0.462	0.46	0.371	0.96	0.294	0.854	0.202	0.33	0.212	0.35	0.377	0.351		1.665	0.979		0.841	0.2	1.142	0.863	1.27	1.61	1.482	0.892	1.82	0.855	1.271	2.29	0.58	1.98	1.699	0.51	0.983	0.6			0.27	0.238	0.617		0.32
2004	0.625	0.171	1.902	0.845	1.375	0.89	0.6	0.433	0.342	0.4	0.57	0.298	0.841	0.37	0.561	0.326	0.46	0.361	0.291		1.868	0.934		0.641	0.14	1.01	0.741	1.23	1.56	1.523	0.903	1.832	0.73	0.89	1.94	0.631	1.193	1.831	0.571	1.144	0.721			0.16	0.177	0.614		0.22
2003	0.769	0.22	3.562	1.132	2.2	1.09	0.731	0.551	0.51	0.641	0.821	0.332	0.984	0.71	0.55	0.298	0.6	0.906	0.393		2.135	0.8		0.422	0.132	1.452	1.295	1.521	2.33	1.695	1.58	2.992	1.35	1.611	3.14	1.2	2.204	1.861	0.551	1.143	0.89			0.22	0.168	0.759		0.25
2002	1.328	0.151	3.172	1.231	2.269	1.46	0.96	0.631	0.591	0.671	0.963	0.367	1.031	0.782	0.635	0.459	0.56	0.906	0.642		2.371	1.18		0.601	0.16	1.587	1.188	2.08	1.82	1.142	1.331	2.672	0.96	1.74	2.7	1.042	1.914	1.921	0.55	1.068	0.72			0.261	0.279	0.72		0.26
2001	1.004	0.18	3.684	1.02	2.128	1.12	0.63	0.782	0.551	0.601	1.252	0.41	2.014	0.792	0.59	2.734	0.571	0.991	0.581		2.296	1.19		0.502	0.141	1.685	1.274	2.37	1.658	1.01	1.082	2.122	0.74	1.391	2.443	0.742	1.732	1.484	0.593	0.591	0.67			0.28	0.245	0.695		0.3
2000	0.885	0.191	3.392	1.141	2.481	1.2	0.531	0.581	0.552	0.502	1.076	0.557	1.903	1.011	0.551	0.699	0.741	1.1	0.572		2.419	1.02		0.512	0.263	1.413	1.487	2.66	2.214	1.746	1.291	1.822	0.671	1.66	1.272	0.461	1.784	1.641	0.472	0.3	0.68			0.361	0.25	0.733		0.23
1999	1.366	0.221	2.414	0.851	2.22	1.14	0.64	0.512	0.55	0.681	1.362	0.794	1.243	0.883	0.64	0.82	0.6	0.931	0.443		1.822	1.18		0.591	0.18	1.277	1.047	1.821	1.776	1.534	1.152	1.221	0.43	1.351	1.553	0.66	1.231	1.371	0.592	0.382	0.59			0.255	0.226	0.75		0.32
1998	0.597	0.241	1.938	0.84	2.172	1.26	0.793	0.591	0.681	0.681	1.291	0.826	1.063	1.033	1.141	0.954	0.64	0.72	0.402		1.681	1.14		0.721	0.33	1.04	0.96	1.321	1.386	1.421	1.27	1.11	0.46	1.141	1.821	0.74	0.721	0.991	0.681	0.344	0.6			0.23	0.25	1.023		0.34
1997	0.556	0.212	2.429	0.703	2.034	0.85	0.872	0.635	0.721	0.551	1.366	1.202	1.393	3.542	1.061	0.653	0.59	0.72	0.41		1.76	0.682		0.473	0.281	1.11	1.145	1.56	1.669	1.881	0.955	1.221	0.42	1.06	1.353	0.75	0.551	0.77	0.502	0.462	0.67			0.194	0.294	0.883		0.383
1996	0.565	0.311	2.906	0.92	2.102	0.711	0.861	0.473	0.721	0.681	1.431	1.268	1.997	1.157	1.522	0.732	0.76	1.051	0.42		2.4	0.641		0.551	0.38	0.94	0.813	2.2	1.552	1.911	1.27	1.151	0.431	1.141	1.101	1.02	0.681	1.001	0.512	0.681	0.722			0.232	0.318	0.722		0.18
1995	0.705	0.304	3.236	1.06	2.155	1.182	0.932	0.591	0.761	0.862	1.572	1.436	1.614	1.067	1.531	0.52	1.14	0.89	0.47		2.46	0.733		0.551	0.291	1.211	1.45	2.59	1.822	3.051	0.593	2.031	0.89	1.7	2.254	1.311	1.313	1.27	0.473	0.522	0.81			0.226	0.318	0.66		0.32
1994	0.699	0.392	2.813	0.841	2.311	1.15	0.971	0.761	0.642	0.581	1.541	1.528	1.024	1.266	1.403	0.598	0.81	1.021	0.55		2.71	0.92		0.512	0.381	1.06	1.271	2.151	1.36	2.961	1.51	1.846	0.72	1.561	2.615	1.19	1.183	1.021	0.675	0.271	0.67			0.263	0.288	0.621		0.26
1993	0.463	0.261	1.895	1.201	1.933	1.69	0.96	0.641	0.73	0.591	1.461	1.378	1.317	1.322	0.971	0.641	0.8	1.231	0.63		2.03	0.771		0.462	0.44	0.89	1.23	2.42	1.37	2.03	1.261	1.185	0.681	1.571	1.972	0.89	0.931	0.76	0.931	0.23	0.71			0.196	0.221	0.625		0.29
1992	0.437	0.354	1.759	1.063	1.512	1.273	0.771	0.552	0.601	0.703	1.574	1.188	2.046	1.365	1.01	0.791	0.72	0.63	0.691		2.411	0.751		0.642	0.51	0.86	1.31	2.11	1.632	1.531	1.061	1.103	0.84	1.432	2.012	0.971	0.941	0.971	0.56	0.171	0.67			0.273	0.279	0.542		0.26
1991	0.771	0.452	2.124	1.263	1.713	1.35	0.701	0.595	0.78	0.891	1.211	0.876	2.432	1.049	1.362	0.583	0.76	0.64	0.801		2.88	0.98		0.761	0.26	0.92	0.98	2.8	1.782	2.201	0.89	1.525	0.81	1.79	2.104	0.85	1.273	1.101	0.464	0.22	0.44			0.238	0.253	0.496		0.38
1990	1.036	0.311	2.667	1.062	2.121	1.141	0.882	0.512	0.64	0.96	1.222	1.063	2.495	0.951	1.271	0.451	0.66	1.173	0.761		3.39	1.05		0.472	0.69	0.796	1.271	2.582	1.692	2.711	0.762	1.691	0.841	1.61	2.065	0.68	1.183	0.98	0.601	0.25	0.43			0.204	0.371	0.532		0.38
1989	1.023	0.344	3.151	0.983	2.101	1.183	1.072	0.762	0.502	0.92	1.404	1.327	2.304	0.691	1.571	0.554	0.741	1.422	0.72		3.44	0.85		0.631	0.52	1.011	0.902	2.75	1.702	2.541	0.851	1.841	0.98	1.831	2.127	0.401	1.063	0.891	0.677	0.212	0.72			0.161	0.514	1.325		0.38
1988	0.851	0.404	2.972	1.371	2.134	1.601	1.032	0.933	0.47	1.16	1.674	1.695	2.556	0.682	1.312	0.727	0.982	1.2	0.8		2.99	0.93		0.697	0.49	1.433	0.857	2.711	1.902	3.653	1.311	2.43	1.261	2.062	3.18	0.57	1.724	1.1	1.063	0.242	0.76			0.275	0.422	0.47		0.42
1987	1.103	0.392	2.565	1.083	2.163	1.74	0.731	0.851	0.59	1.052	1.572	1.675	2.546	0.291	1.435	0.914	1.132	1.06	1.03		2.12	2.08		0.32	0.46	1.354	0.817	2.121	1.872	3.151	1.31	1.975	0.85	2.021	4.247	0.59	1.428	0.931	0.721	0.191	0.5			0.301	0.25	0.42		0.39
1986	1.34	0.363	2.489	1.066	2.333	1.57	0.763	0.855	0.6	1.203	1.643	1.842	2.296	0.457	1.324	0.876	1.553	0.564	0.665		1.99	2.18		0.651	0.551	1.531	0.858	1.692	1.732	2.263	1.822	1.999	0.641	1.684	3.586	0.512	1.173	0.84	0.679	0.292	0.461			0.22	0.324	0.22		0.38
1985	1.14	0.392	2.965	1.082	2.59	1.58	1.045	1.08	0.5	1.372	1.641	1.112	2.372	0.446	1.441	0.82	1.454	0.43	0.681		2.24	1.86		0.532	0.59	1.26	0.97	1.82	1.763	1.743	1.611	1.738	0.89	1.482	2.602	0.51	1.323	0.891	0.479	0.311	0.446			0.242	0.351	0.35		0.34
1984	1.231	0.332	3.383	1.281	2.709	2.191	1.364	1.241	0.53	1.655	1.82	1.83	1.977	0.614	1.572	0.395	1.62	0.67	0.899		2.54	1.89		0.69	0.433	1.48	0.744	2.41	1.89	2.155	2.164	2.131	0.97	1.49	3.07	0.47	1.522	0.98	0.626	0.371	0.691			0.32	0.427	0.451		0.42
1983	1.21	0.505	3.314	1.23	3.015	1.981	1.336	1.055	0.53	1.153	2.09	2.21	2.001	0.521	1.221	0.455	1.28	1.09	1.143		2.92	2.115		0.977	0.591	1.02	0.816	2.292	1.72	1.772	1.959	1.49	0.761	1.837	2.85	0.7	1.523	1.011	0.699	0.483	0.68			0.24	0.279	0.694		0.42
1982	1.03	0.286	4.665	1.48	2.97	1.933	1.162	1.324	0.641	2.077	1.91	2.638	1.023	0.47	1.483	0.331	1.872	1.271	1.108		3.001	0.945		0.551	0.632	1.1	0.483	2.12	2.37	2.406	2.493	2.592	0.88	1.959	3.199	0.521	2.163	1.161	0.786	0.292	0.851			0.204	0.233	1.022		0.55
1981	1.61	0.393	2.93	1.23	3.316	1.03	0.603	0.566	0.59	1.403	2.15	2.684	1.187	0.59	1.061	0.421	1.523	0.561	1.217		2.241	1.312		0.815	0.941	0.84	0.665	2.11	2.112	1.594	1.371	1.41	0.84	1.604	1.993	0.89	1.193	0.79	0.402	0.421	0.64			0.414	0.314	0.811		0.36
1980	0.851	0.283	2.676	1.471	2.082	1.61	0.831	1.194	0.8	1.103	1.11	1.389	1.396	0.46	1.024	0.192	1.531	0.896	0.913		2.812	0.597		0.422	1.353	1.27	0.633	2.252	2.125	2.073	1.581	2.081	0.741	1.765	2.061	0.63	1.562	0.76	0.459	0.541	1.191			0.272	0.132	0.554		0.43
1979	0.97	0.352	2.703	1.2	2.408	1.63	0.873	1.08	0.55	1.356	1.39	1.769	1.704	0.64	0.971	0.492	1.524	0.866	1.017		3.211	1.153		0.556	1.442	1.1	0.671	2.03	2.242	2.067	1.98	2.11	0.89	2.008	2.301	0.97	1.024	0.981	0.337	0.904	0.571			0.382	0.221	0.523		0.314
1978	1.19	0.337	3.449	1.7	1.93	2.02	1.16	1.45	0.72	1.193	1.36	1.743	1.124	0.89	1.473	0.62	1.624	0.971	0.853		2.841	0.761		0.607	0.971	1.49	0.883	2.372	2.141	2.407	2.562	2.591	0.841	2.336	3.06	0.831	1.312	1.271	0.449	0.771	0.99			0.377	0.294	0.328		0.55
1977	1.36	0.439	3.039	1.261	2.207	1.12	0.861	1.192	0.72	0.681	1.511	1.651	1.076	0.72	1.11	0.724	0.677	0.97	0.972		1.78	0.895		0.883	1.323	1.35	0.854	2.081	1.761	2.058	1.951	2.083	0.89	1.997	2.712	0.95	0.851	0.93	0.495	0.819	0.93			0.313	0.279	0.432		0.55
1976	1.18	0.42	3.295	1.43	1.884	1.57	0.802	1.236	0.891	1.193	1.371	1.497	1.18	0.8	1.281	0.765	0.74	0.761	0.805		1.95	0.631		0.933	1.271	1.35	0.813	2.55	2.402	2.409	1.752	2.202	1.191	2.176	3.47	1.15	1.352	0.931	0.605	0.518	0.834			0.221	0.462	0.582		0.64
1975	1.011	0.455	2.482	1.06	2.279	2.01	0.873	1.108	0.89	1.263	1.481	1.23	1.521	0.721	1.4	0.721	4.153	0.72	1.147		2.111	0.854		1.067	1.313	1.15	0.897	2.061	2.29	1.54	1.73	2.462	1.1	2.379	2.83	1.465	1.994	1.01	0.604	0.73	0.47			0.296	0.344	0.767		0.68
1974	0.93	0.59	1.945	1.01	2.261	1.981	1.162	1.108	1.1	1.291	1.61	1.35	1.204	0.85	1.994	1.103	4.849	1.061	1.49		2.16	1.233		1.203	1.585	1.48	0.963	2.51	2.563	1.768	1.433	2.395	1.1	2.503	3.3	1.38	1.742	0.981	0.493	0.711	0.631			0.26	0.344	0.93		0.57
1973	1.02	0.432	2.541	1.22	2.335	2.61	1.06	1.272	1.191	1.546	1.99	1.441	1.11	0.84	1.261	1.028	2.451	1.021	1.753		2.501	1.356		1.193	1.708	1.52	0.853	2.71	3.214	2.22	1.361	2.585	1.182	3.069	4.2	1.5	1.652	0.89	0.625	0.768	0.84			0.304	0.401	1.214		0.61
1972	1.311	0.46	2.722	1.25	3.091	2.43	1.102	1.126	1.1	1.408	2.03	1.69	1.144	1.1	1.332	1.356	1.604	1.351	1.659		2.45	1.445		1.273	2.125	1.48	1.072	2.89	2.833	1.918	1.462	2.122	1.034	2.811	3.55	1.32	1.615	0.991	0.561	1.008	0.8			0.357	0.41	1.63		0.57
1971	1.27	0.523	2.915	1.19	2.7	3.02	1.201	1.63	0.97	1.871	1.95	1.57	0.843	1.151	1.501	0.894	3.133	1.531	1.791		2.332	1.403		1.024	2.05	1.91	0.894	3.61	3.168	2.562	2.102	2.893	0.904	2.806	3.941	1.144	1.838	1.041	0.371	0.846	0.89			0.304	0.321	1.021		0.53
1970	1.101	0.614	2.412	1.27	3.059	2.5	1.12	1.237	0.98	1.89	2.32	2.351	0.894	1.01	1.63	0.974	2.782	1.321	1.679		1.78	1.654		1.051	1.928	1.4	0.778	3.57	2.957	2.871	2.39	2.042	0.643	3.022	3.919	1.091	1.128	0.82	0.47	1.433	1.02			0.357	0.369	1.353		0.65
1969	0.85	0.601	2.656	1.26	3.253	2.1	0.861	1.249	1.051	1.836	1.99	1.941	0.895	0.931	2.236	1.112	2.542	1.892	1.343		1.753	1.356		0.854	1.861	1.27	0.961	3.301	3.006	2.743	2.59	2.875	0.547	2.25	3.92	0.84	1.066	1	0.402	1.217	1.141			0.331	0.382	1.017		0.931
1968	1.02	0.703	2.656	1.06	2.851	2.18	0.771	1.045	1.27	1.281	2.341	1.852	1.053	1.13	1.58	0.975	1.981	1.273	1.573		1.622	1.745		0.981	2.102	1.39	0.92	3.33	3.126	1.998	2.311	2.211	0.533	2.192	2.342	0.742	1.23	1.141	0.33	1.265	1.19			0.33	0.363	1.189		0.77
1967	0.971	0.822	2.727	1.06	2.098	2.65	1.03	1.035	1.7	1.387	1.68	1.636	1.277	1.402	1.495	1.624	2.075	1.441	1.115		1.855	1.525		1.183	1.979	1.19	1.041	3.171	3.104	2.342	2.721	1.732	0.521	1.962	2.882	0.66	1.23	1.271	0.381	1.585	1.1			0.202	0.298	1.42		0.76
1966	1.191	0.525	2.422	1.06	2.602	3.041	1.23	1.302	1.65	1.281	1.74	1.942	1.237	1.302	1.591	1.652	1.704	2.204	1.272		1.512	1.366		1.273	2.001	1.1	1.032	2.164	2.533	2.25	2.24	1.682	0.68	2.266	2.546	0.713	1.35	1.271	0.492	1.392	1.06			0.238	0.363	1.05		0.591
1965	1.051	0.611	2.357	0.911	2.28	3.42	1.86	1.488	1.61	1.021	1.82	1.82	1.61	1.463	1.281	1.735	2.212	1.782	1.564		2.002	1.785		1.525	3.024	1.26	1.667	2.313	3.507	2.12	1.67	1.413	0.971	2.276	2.001	0.65	1.11	1.231	0.584	1.879	1.1			0.313	0.524	1.211		0.76
1964	1.061	0.745	2.601	1.51	2.233	3.97	1.663	2.158	1.65	1.632	2.12	1.832	1.766	0.773	1.462	1.443	1.943	1.652	1.563		1.944	1.659		1.613	3.144	2.002	1.374	2.992	3.364	3.201	3.142	2.753	1.011	2.693	2.502	0.72	1.747	1.61	0.761	1.588	1.31			0.286	0.436	1.041		0.822
1963	2.08	0.636	2.363	1.42	2.732	3.47	1.731	1.723	1.65	1.423	2.28	1.691	1.526	1.082	1.584	1.824	2.253	1.801	1.792		2.164	1.655		1.874	3.105	1.78	1.544	2.752	2.8	2.731	3.122	3.015	1.111	2.361	2.616	0.891	1.683	1.482	0.493	1.951	0.891			0.263	0.49	1.15		0.769
1962	1.612	0.711	1.998	1.26	2.653	3.532	1.77	1.734	1.9	1.159	1.74	1.571	1.631	1.223	2.058	1.28	2.502	1.997	1.581		1.78	2.076		1.904	2.641	1.992	1.567	3.022	3.181	2.703	3.241	2.833	1.221	2.783	3.195	0.703	1.75	1.611	0.514	1.743	1.18			0.232	0.584	1.411		0.865
1961	1.381	0.706	2.058	1.39	2.852	2.91	1.832	1.574	1.91	1.382	1.99	1.732	1.743	1.483	2.287	1.883	2.516	2.167	1.524		2.001	2.243		2.296	3.297	1.892	1.953	2.201	3.07	2.029	2.371	2.135	1.322	2.481	3.178	0.775	1.645	1.271	0.644	2.075	0.89			0.293	0.574	1.391		0.556
1960	1.26	0.693	3.168	1.82	2.188	3.47	2.204	2.292	1.86	1.891	1.82	1.691	1.48	1.09	2.067	1.502	1.72	2.324	1.776		2.12	1.986		1.655	2.555	2.231	1.664	2.132	3.24	2.767	2.711	2.428	1.601	3.374	3.211	0.754	1.822	1.481	0.654	2.13	1.32			0.316	0.614	1.17		0.614
1959	1.78	0.86	2.763	1.56	3.168	3.481	2.294	2.09	1.74	1.56	2.14	1.95	1.708	1.16	1.809	1.61	2.4	1.822	1.981		2.111	2.267		1.987	3.632	1.956	2.141	1.86	3.648	2.852	2.711	2.116	1.362	3.157	2.534	0.693	1.223	1.141	0.713	2.493	1.43			0.355	0.79	1.111		0.655
1958	1.23	0.914	2.693	1.84	2.759	3.55	2.034	2.959	1.82	2.445	2.18	1.741	1.659	0.764	1.875	1.65	2.571	1.862	1.694		2.098	1.703		2.354	3.235	2.198	2.13	1.65	3.481	3.399	3.455	3.837	1.61	3.321	3.992	0.804	2.256	1.361	0.642	2.418	1.61			0.365	0.677	1.031		0.754
1957	1.52	1.09	2.131	1.57	2.995	2.41	1.992	2.395	2.442	2.524	2.17	2.121	1.912	1.001	1.838	2.12	2.43	1.608	1.883		2.028	2.285		2.307	3.375	2.492	2.331	1.122	3.191	2.858	4.275	2.73	1.552	2.702	4.741	1.021	2.204	1.141	0.59	3.262	1.361			0.396	0.812	0.772		0.53
1956	1.27	0.788	2.259	2.112	2.74	3.12	1.91	2.883	2.813	2.613	2.44	2.15	2.512	0.772	2.274	1.44	2.04	1.81	2.012		2.479	2.518		2.546	2.834	2.461	2.851	1.516	2.823	3.354	5.088	2.327	1.934	2.907	4.022	1.108	2.034	1.191	0.821	2.693	1.52			0.414	0.747	0.891		0.556
1955	1.582	1.016	2.555	1.701	2.762	3.581	2.83	2.504	2.397	3.02	2.29	2.251	3.348	0.71	1.758	1.701	2.84	2.376	2.105		2.907	2.552		3.389	4.168	3.343	2.856	1.499	3.487	3.759	4.553	3.009	2.417	3.18	3.316	1.312	1.865	1.221	0.871	3.248	1.291			0.474	0.658	0.654		0.645
1954	1.58	1.289	3.05	2.241	2.774	5.49	3.221	3.19	2.001	2.96	2.5	2.59	3.447	0.801	2.28	2.46	1.82	2.419	2.321		3.856	2.529		3.132	3.535	3.53	2.454	1.875	3.681	4.153	4.148	3.448	2.751	3.476	3.694	1.406	2.595	1.613	0.801	2.487	1.351			0.4	0.462	0.836		0.514
1953	1.88	0.744	2.754	2.131	3.72	3.771	2.79	3.266	2.402	2.54	2.79	3.04	3.642	0.642	2.473	1.261	2.2	2.678	3.043		2.08	3.471		2.379	3.607	2.813	2.79	2.216	2.63	3.613	3.756	4.06	2.793	2.688	4.166	1.773	1.825	1.67	0.77	3.043	1.211			0.383	0.516	0.56		0.583
1952	1.65	0.674	2.742	2.617	3.211	4.17	2.37	3.11	2.01	2.461	2.21	2.25	4.229	0.54	2.63	1.16	1.77	1.828	2.672		2.376	3.738		2.739	4.523	2.81	3.105	3.26	2.28	3.133	3.674	3.452	2.515	2.384	4.801	1.11	2.154	1.911	0.992	4.043	1.071			0.464	0.694	0.621		0.457
1951	1.69	0.907	3.167	2.602	3.882	4.373	2.24	4.842	2.262	2.5	2.252	2.11	2.767	0.431	2.885	1.62	1.53	3.557	2.018		2.546	3.039		2.017	2.982	2.271	2.413	3.438	2.04	3.608	5.104	4.215	2.515		5.545	0.981	2.635	2.328	0.94	2.718	1.351			0.424	0.564	0.721		0.393
1950	1.271	1.067	1.963	1.9	4.665	3.664	1.78	3.764	2.631	2.07	2.21	2.67	3.602	0.432	2.311	2.78	1.52	2.562	2.602		2.24	3.796		1.644	3.234	1.422	2.31	2.43	1.7	2.572	3.144	2.916	2.022		3.881	1.01	1.984	1.352	0.62	2.28	0.84			0.375	0.747	1.32		0.281
1949	1.11	1.028	2.081	1.761	3.46	4.262	2.37	4.097	3.202	2.25	1.681	2.861	3.256	0.5	2.093	2.58	1.74	1.732	1.812		2.336	2.484		1.887	3.569	1.541	2.339	1.575	1.29	2.667	2.441	3.169	2.362		2.867	0.89	2.166	1.443	0.913	2.157	0.85			0.482	0.873	1.24		0.301
1948	1.006	1.108	2.222	1.901	3.427	4.912	3.01	4.076	3.606	2.15	2.21	2.349	3.997	0.811	2.39	2.01	2.701	1.909	1.765		2.722	2.673		2.692	4.259	1.881	2.745	1.945	1.69	2.649	2.8	3.059	2.192		4.288	1.191	2.493	1.868	1.08	3.637	1.231			0.573	1.132	1.1		0.452
1947	1.002	1.017	2.872	2.621	3.451	5.997	2.78	4.127	2.065	2.8	2.46	3.232	3.437	0.802	2.971	1.78	2.26	3.12	2.014		3.307	3.492		3.035	4.211	2.53	3.182	2.763	2.04	3.347	3.301	4.736	2.547		5.709	1.44	3.663	2.805	1.441	3.787	1.65			0.421	1.07	0.911		0.714
1946	1.544	1.074	3.041	2.49	3.203	6.137	3.261	6.118	2.242	3	3.671	4.796	2.629	0.761	2.751	1.87	1.69	2.996	2.346		2.975	5.261		2.881	3.615	2.763	2.5	3.531	3	3.215	2.77	4.857	2.532		5.936	1.9	3.595	2.669	1.551	3.745	1.31			0.321	0.893	1.321		0.786
1945	2.26	1.14	2.889	2.761	5.18	5.64	2.77	4.567	2.135	2.93	3.49	4.707	2.567	0.854	2.75	1.94	1.8	2.186	2.326		2.331	4.397		2.823	4.024	1.8	2.59	3.093	2.202	3.168	3.106	3.731	2.381		5.471	1.86	3.307	2.466	1.731	2.721	1.231			0.16	0.532	1.27		0.713
1944	2.209	1.579	2.47	2.892	4.449	5.76	2.299	4.396	2.783	3	2.57	1.148	2.663	0.871	1.63	2.16	1.681	1.79	2.114		2.16	3.95		3.587	3.67	1.8	2.703	2.94	2.014	3.328	2.736	2.962	2.505		5.246	1.681	3.139	2.336	2.011	3.679	0.93			0.321	0.845	1.341		0.412
1943	2.151	1.794	2.749	2.694	3.695	6.81	2.102	4.141	4.356	2.79	2.18	1.936	2.803	1.082		2.58	1.551	1.78	2.165		2.03	3.202		3.841	4.248	2.39	3.106	3.046	1.96	3.47	4.338	3.909	2.509		3.708	1.67	3.48	2.415	1.911	3.626	1.16			0.42	1.041	1.721		0.794
1942	2.394	1.762	3.159	3.051	2.949	6.927	2.491	2.384	5.161	2.93	2.46	2.302	2.875	1.011		2.99	2.123	2.026	1.821		2.332	3.432			3.381	2.452	3.416	3.77	1.935	3.789	5.469	5.235	2.452		3.611	1.79	3.099	2.546	1.99	3.822	1.31			0.292	0.921	0.97		0.866
1941	2.214	1.99	2.533	3.002	4.259	6.211	2.632	4.085	3.173	2.9	2.21	2.487	3.306	1.182		3.237	2.041	2.355	1.783		2.42	4.302			2.771	3.033	4.206	3.356	1.56	4.183	5.412	7.288	1.678		4.419	1.93	3.623	2.376	2.561	3.559	1.301			0.4	0.822	1.251		0.757
1940	2.136	1.813	1.72	3.135	2.131	5.927	3.093	5.313	3.626	3.042	1.96	2.64	4.164	1.202		3.058	2.08	2.712	1.32		1.662				2.703	3.701	4.342	3.374		4.566			3.204			1.99	3.852	2.675	2.621	3.046	1.481			0.39	0.72	1.1		0.747
1939	2.73	1.45	3.315	3.286	2.836	7.902	3.246	6.052	4.601	3.659	2.181	2.492	3.828	1.724		2.851	2.571	2.576	2.495		1.353				3.51	3.81	4.638	4.165		4.734			2.677			2.08	3.74	2.758	2.811	3.797	1.4			0.491	0.945	1.038		0.731
1938	2.953	1.49	3.142	3.683	3.902	4.622	2.61		4.11	3.763	2.06	2.501	5.376	1.873		1.35	2.462	2.489			1.144				1.904	4.457	3.611			5.784						2.471	4.006	3.278	3.301	2.651	1.65			0.641	0.843	0.977		0.952
1937	3.404	1.13	3.359	3.496	3.217	4.06	2.921		4.23	3.729	1.39	2.596	4.112	2.294		2.201	0.713	2.539			1.406				2.86	4.552	3.14			4.907						2.69	3.297	2.881	2.99	1.896	1.48			0.641	0.89	0.751		0.573
1936	3.049	1.66	3.643	3.036	2.432	3.818	2.795		4.621	3.682	2.143	5.057	3.942	2.151		2.262	1.444	2.529			1.034				1.577	4.52	2.472									2.34	2.294	2.2	2.67	1.519	1.44			0.48	0.711	1.31		0.54
1935	1.905	1.671	3.504	3.329	2.554	2.717	2.199		5.161	4.166	1.799	4.214	3.95	1.933		1.75	1.523	2.067			0.84				1.996	6.96	2.772									1.97	2.615	1.784	2.62	1.946	2.37			0.634	0.84	1.72		0.492
1934	2.473	1.44	4.336	2.751	3.648	3.239	2.452		3.851	2.41	1.732		4.231	1.994		1.75	1.726				1.1					4.977	3.18									1.69	2.483	2.438	2.33	2.03	1.78			0.951	1.54	1.281		0.512
1933	1.803	1.733	3.919	3.526	3.721	3.096	2.212		4.413	3.13	1.971		4.3	1.354		1.58	2.297				1.151					5.676	3.1									1.762	3.119	2.986	2.6	2.198	1.9			1.045	1.84	0.804		0.591
1932	3.117	2.414	1.598	3.813	2.363	3.903	2.328		3.85	4.952	2.867		4.964	1.884		2.432	1.772				1.31					4.884	3.06									2.103	3.29	3.014	0.512	1.783	1.78			0.654	1.28	0.992		0.89
1931	3.112	2.685	3.07	4.201	2.676	4.255	1.828		4.101	3.6	3.168			2.264		2.62	2.764				1.31					3.671	2.36									2.346	2.311	2.635	0.78	1.691	1.61			0.461	1.01	1.186		1.15
1930		2.606	4.326	4.65	3.466	5.158	2.052		4.661	4.19	2.238			4.115		1.815	3.342				1.311					3.318										1.901	1.643	2.736	0.86	1.851	1.9			0.474	1.142	1.15		0.53
1929		2.633	4.486	4.191	2.675	5.898	1.713		5.591	5.13	1.713			3.944		1.902					1.491					3.208										1.99	1.81	3.409	0.65	1.719	1.95			0.631	1.214	0.802		0.593
1928		2.43			3.561	8.461	1.772		4.993	4.7	1.075			2.773		2.176					2.11					4.012										3.013	1.797	3.525	2.541	1.647	2.031			0.603	0.931	0.89		0.653
1927						6.851	2.708		4.963	4.19				2.325		1.655					2.03															3.662	2.44	3.532	2.044	2.453	1.82			0.514	0.921	0.68		0.6
1926						9.083	2.821		7.363	4.48				2.704		1.795					1.669															3.301		1.834	2.244	2.178	2.264			0.672	1.194	1.01		0.46
1925							3.172		12.661	3.64				2.483		2.215					2.24															3.803		2.791	2.802	2.213	1.741			0.443	0.898	0.811		0.55
1924							3.066			5.171				2.334		2.501					2.54															4.531		2.309	2.11	1.95	2.31			0.494	1.044	0.95		0.533
1923							3.132			4.53				2.357		2.582					3.051															3.986		2.533	2.301	1.208	1.571			0.383	0.755	0.963		0.59
1922							3.175			6.26				3.801							2.582																	3.403	1.821	1.635	1.56			0.381	1.01	1.021		0.522
1921							4.095			4.83				3.76							2.161																		3.083	1.156	1.66			0.391	1.007	1.503		0.41
1920							5.406			6.141				2.185							3.39																		4.616	1.169	1.77			0.481	1.185	1.44		0.51
1919							6.817			7.666				1.711							3.109																				2.25			0.692	1.704	1.082		0.6
1918										7.752				1.667							3.019																				1.65			0.47	1.186	0.661		0.742
1917										16.631				1.649							2.671																				1.73			0.431	1.01	0.674		0.76
1916														1.93							3.052																				1.39			0.271	0.873	0.89		0.682
1915														1.788							3.21																				0.963			0.211	0.722	1.341		0.42
1914														2.375							3.055																				1.25			0.231	0.91	1.21		0.512
1913														2.709																											1.48			0.351	1.16	1.22		0.931
1912														3.201																											1.57			0.371	1.181	0.871		0.68
1911														3.841																											1.4			0.29	0.891	0.9		0.472
1910														2.493																											1.61			0.35	1.031	0.722		0.46
1909																																									1.721			0.33	0.88	1.034		0.47
1908																																									1.659			0.311	0.792	1.183		0.508
1907																																									1.649			0.37	0.77	1.06		0.556
1906																																									1.511			0.39	0.731	1.02		0.607
1905																																									1.373			0.311	0.72	1.48		0.641
1904																																									1.412			0.191	0.67	1.517		0.726
1903																																									1.516			0.38	0.881	1.858		0.664
1902																																									1.291			0.423	0.751	1.757		0.665
1901																																									1.531			0.38	0.915	1.423		0.732
1900																																									1.291			0.3	0.896	1.411		0.61
1899																																									1.631			0.38	1.101	1.825		0.713
1898																																									1.797			0.47	1.222	1.98		0.757
1897																																									1.366			0.42	1.099	1.45		0.574
1896																																									1.591			0.25	0.972	1.371		0.834
1895																																									1.837			0.34	0.963	1.541		0.498
1894																																									1.973			0.47	1.206	1.613		0.539
1893																																									1.646			0.42	1.065	1.961		0.757
1892																																									1.442			0.371	1.037	1.981		0.871
1891																																									2.108			0.52	1.52	1.751		0.881
1890																																									1.94			0.51	1.325	1.482		1.083
1889																																									1.884			0.34	1.164	1.941		1.243
1888																																									1.327			0.301	0.997	2.162		0.901
1887																																									1.638			0.501	1.023	1.954		0.774
1886																																									1.629			0.331	1.157	2.047		1.089
1885																																									1.55			0.45	1.194			1.247
1884																																									1.357			0.321	1.009			1.082
1883																																									1.501			0.38	0.891			0.832
1882																																									1.654			0.47	0.888			0.932
1881																																									1.268			0.42	0.857			1.211
1880																																									1.587			0.512	1.012			0.91
1879																																									1.814			0.51	1.007			1
1878																																									2.011			0.46	1.08			0.791
1877																																									2.507			0.68	1.277			0.653
1876																																									2.736			0.44	0.824			1.22
1875																																									2.244			0.33	1.037			1.02
1874																																									1.558			0.26	0.634			0.53
1873																																									1.996			0.45	0.55			0.56
1872																																									1.889			0.53	0.512			0.77
1871																																									2.202			0.61	0.48			0.891
1870																																												0.73				0.89
1869																																												0.43				1.1
1868																																												0.43				0.59
1867																																												0.321				0.68
1866																																												0.46				0.55
1865																																												0.42				0.59
1864																																												0.39				0.986
1863																																												0.371				0.794
1862																																												0.25				0.922
1861																																												0.18				0.655
1860																																												0.301				0.557
1859																																												0.31				0.57
1858																																												0.262				0.55
1857																																												0.35				0.51
1856																																												0.25				0.69
1855																																												0.231				0.82
1854																																												0.31				0.931
1853																																												0.19				0.812
1852																																												0.391				0.675
1851																																												0.25				0.845
1850																																												0.28				1.082
1849																																												0.171				1.251
1848																																												0.41				1.14
1847																																												0.39				1.17
1846																																												0.57				0.671
1845																																												0.421				0.973
1844																																												0.42				1.003
1843																																												0.54				1.463
1842																																												0.35				1.406
1841																																												0.52				1.246
1840																																												0.45				1.935
1839																																												0.38				1.397
1838																																												0.51				1.378
1837																																												0.37				1.528
1836																																												0.371				2.175
1835																																												0.41				1.662
1834																																												0.23				2.253
1833																																												0.311				2.329
1832																																												0.3				3.455
1831																																												0.43				0.908
1830																																												0.45				0.783
1829
1828
1827
1826
1825
1824
1823
1822
1821
1820
1819
1818
1817
1816
1815
1814
1813
1812
1811
1810
1809
1808
1807
1806
1805
1804
1803
1802
1801
1800
1799
1798
1797
1796
1795
1794
1793
1792
1791
1790
1789
1788
1787
1786
1785
1784
1783
1782
1781
1780
1779
1778
1777
1776
1775
1774
1773
1772
1771
1770
1769
1768
1767
1766
1765
1764
1763
1762
1761
1760
[truncated: 41 more columns]

## Sheet: norm
year	track (sz)/kontrol (k)	study plot	norm_av
2007	sz	K	-1.03703
2006	sz	K	-0.832555
2005	sz	K	-0.885805
2004	sz	K	-0.937394
2003	sz	K	-0.551635
2002	sz	K	-0.420929
2001	sz	K	-0.216742
2000	sz	K	-0.359008
1999	sz	K	-0.456911
1998	sz	K	-0.489208
1997	sz	K	-0.298749
1996	sz	K	-0.292319
1995	sz	K	-0.188347
1994	sz	K	-0.269704
1993	sz	K	-0.326495
1992	sz	K	-0.404239
1991	sz	K	-0.309298
1990	sz	K	-0.235239
1989	sz	K	-0.134374
1988	sz	K	-0.00569105
1987	sz	K	-0.0512827
1986	sz	K	-0.0601699
1985	sz	K	-0.0355316
1984	sz	K	0.193583
1983	sz	K	0.195461
1982	sz	K	0.3641
1981	sz	K	0.0310857
1980	sz	K	-0.203953
1979	sz	K	-0.0823515
1978	sz	K	0.0846975
1977	sz	K	-0.169344
1976	sz	K	-0.110819
1975	sz	K	0.136575
1974	sz	K	0.307381
1973	sz	K	0.251963
1972	sz	K	0.334621
1971	sz	K	0.507161
1970	sz	K	0.470312
1969	sz	K	0.430934
1968	sz	K	0.286139
1967	sz	K	0.331658
1966	sz	K	0.45615
1965	sz	K	0.524646
1964	sz	K	0.660554
1963	sz	K	0.753327
1962	sz	K	0.670308
1961	sz	K	0.772041
1960	sz	K	0.844005
1959	sz	K	0.95672
1958	sz	K	0.98302
1957	sz	K	0.976661
1956	sz	K	1.10715
1955	sz	K	1.35057
1954	sz	K	1.71957
1953	sz	K	1.67137
1952	sz	K	1.42116
1951	sz	K	1.66184
1950	sz	K	1.50498
1949	sz	K	1.39024
1948	sz	K	1.65642
1947	sz	K	1.8911
1946	sz	K	2.23878
1945	sz	K	2.18618
1944	sz	K	1.72173
1943	sz	K	1.98453
1942	sz	K	2.09565
1941	sz	K	2.15545
1940	sz	K	2.11518
1939	sz	K	2.78045
1938	sz	K	2.37161
1937	sz	K	2.11463
1936	sz	K	2.36114
1935	sz	K	2.03321
1934	sz	K	1.94949
1933	sz	K	2.04971
1932	sz	K	2.36369
1931	sz	K	2.48041
1930	sz	K	3.0957
1929	sz	K	3.19662
1928	sz	K	3.09216
2007	sz	M-W	-0.896215
2006	sz	M-W	-0.895574
2005	sz	M-W	-1.12154
2004	sz	M-W	-1.06342
2003	sz	M-W	-0.874158
2002	sz	M-W	-0.923122
2001	sz	M-W	-0.917997
2000	sz	M-W	-1.01702
1999	sz	M-W	-1.11669
1998	sz	M-W	-1.05994
1997	sz	M-W	-1.08246
1996	sz	M-W	-1.11925
1995	sz	M-W	-1.01894
1994	sz	M-W	-1.21288
1993	sz	M-W	-1.15659
1992	sz	M-W	-1.191
1991	sz	M-W	-1.20052
1990	sz	M-W	-1.23045
1989	sz	M-W	-1.03185
1988	sz	M-W	-1.00146
1987	sz	M-W	-1.12712
1986	sz	M-W	-1.22752
1985	sz	M-W	-1.22102
1984	sz	M-W	-1.09463
1983	sz	M-W	-1.12694
1982	sz	M-W	-0.980688
1981	sz	M-W	-1.15522
1980	sz	M-W	-0.93145
1979	sz	M-W	-1.14067
1978	sz	M-W	-0.946276
1977	sz	M-W	-1.05665
1976	sz	M-W	-1.12978
1975	sz	M-W	-1.15394
1974	sz	M-W	-1.11458
1973	sz	M-W	-0.969248
1972	sz	M-W	-0.861437
1971	sz	M-W	-0.825927
1970	sz	M-W	-0.792156
1969	sz	M-W	-0.716011
1968	sz	M-W	-0.807257
1967	sz	M-W	-0.804969
1966	sz	M-W	-0.79243
1965	sz	M-W	-0.672356
1964	sz	M-W	-0.664119
1963	sz	M-W	-0.833432
1962	sz	M-W	-0.685534
1961	sz	M-W	-0.783644
1960	sz	M-W	-0.664485
1959	sz	M-W	-0.589438
1958	sz	M-W	-0.597675
1957	sz	M-W	-0.696059
1956	sz	M-W	-0.627327
1955	sz	M-W	-0.633825
1954	sz	M-W	-0.696975
1953	sz	M-W	-0.761313
1952	sz	M-W	-0.868301
1951	sz	M-W	-0.791973
1950	sz	M-W	-0.920376
1949	sz	M-W	-0.812656
1948	sz	M-W	-0.534526
1947	sz	M-W	-0.306182
1946	sz	M-W	-0.473756
1945	sz	M-W	-0.676199
1944	sz	M-W	-0.695144
1943	sz	M-W	-0.395689
1942	sz	M-W	-0.426257
1941	sz	M-W	-0.343065
1940	sz	M-W	-0.35963
1939	sz	M-W	-0.386445
1938	sz	M-W	-0.296664
1937	sz	M-W	-0.449137
1936	sz	M-W	-0.479705
1935	sz	M-W	-0.275156
1934	sz	M-W	-0.295932
1933	sz	M-W	-0.127351
1932	sz	M-W	-0.0374776
1931	sz	M-W	-0.360728
1930	sz	M-W	-0.382144
1929	sz	M-W	-0.384798
1928	sz	M-W	-0.383151
1927	sz	M-W	-0.388459
1926	sz	M-W	-0.223813
1925	sz	M-W	-0.325584
1924	sz	M-W	-0.379307
1923	sz	M-W	-0.527021
1922	sz	M-W	-0.47101
1921	sz	M-W	-0.412437
1920	sz	M-W	-0.363474
1919	sz	M-W	-0.182812
1918	sz	M-W	-0.299135
1917	sz	M-W	-0.447627
1916	sz	M-W	-0.686201
1915	sz	M-W	-0.572258
1914	sz	M-W	-0.591478
1913	sz	M-W	-0.390851
1912	sz	M-W	-0.371338
1911	sz	M-W	-0.576965
1910	sz	M-W	-0.576867
1909	sz	M-W	-0.587261
1908	sz	M-W	-0.521857
1907	sz	M-W	-0.580593
1906	sz	M-W	-0.525779
1905	sz	M-W	-0.557059
1904	sz	M-W	-0.572552
1903	sz	M-W	-0.460669
1902	sz	M-W	-0.379281
1901	sz	M-W	-0.369573
1900	sz	M-W	-0.403697
1899	sz	M-W	-0.362709
1898	sz	M-W	-0.247001
1897	sz	M-W	-0.439488
1896	sz	M-W	-0.445862
1895	sz	M-W	-0.443508
1894	sz	M-W	-0.249354
2007	k	K	-0.391876
2006	k	K	0.00348508
2005	k	K	-0.12303
2004	k	K	-0.24008
2003	k	K	0.345314
2002	k	K	0.245099
2001	k	K	0.0297129
2000	k	K	0.0341926
1999	k	K	-0.250268
1998	k	K	-0.38697
1997	k	K	-0.435669
1996	k	K	-0.307637
1995	k	K	0.135925
1994	k	K	0.0927176
1993	k	K	-0.186396
1992	k	K	-0.203448
1991	k	K	-0.0031622
1990	k	K	0.0492935
1989	k	K	0.0423572
1988	k	K	0.43144
1987	k	K	0.283538
1986	k	K	0.147485
1985	k	K	-0.00142812
1984	k	K	0.245027
1983	k	K	0.209623
1982	k	K	0.362655
1981	k	K	-0.0788111
1980	k	K	0.078267
1979	k	K	0.241487
1978	k	K	0.423564
1977	k	K	0.146546
1976	k	K	0.3628
1975	k	K	0.357814
1974	k	K	0.496251
1973	k	K	0.756651
1972	k	K	0.673777
1971	k	K	0.881793
1970	k	K	0.74509
1969	k	K	0.663083
1968	k	K	0.496829
1967	k	K	0.556365
1966	k	K	0.377756
1965	k	K	0.603547
1964	k	K	1.09718
1963	k	K	1.04732
1962	k	K	1.14342
1961	k	K	1.02919
1960	k	K	1.14747
1959	k	K	1.15332
1958	k	K	1.53966
1957	k	K	1.55866
1956	k	K	1.65259
1955	k	K	2.04601
1954	k	K	2.20583
1953	k	K	1.98755
1952	k	K	2.19398
1951	k	K	2.13524
1950	k	K	1.31323
1949	k	K	1.12553
1948	k	K	1.71798
1947	k	K	2.59291
1946	k	K	2.7424
1945	k	K	2.27763
1944	k	K	2.22004
1943	k	K	2.404
1942	k	K	2.62282
1941	k	K	2.95843
1940	k	K	2.53709
1939	k	K	2.80444
1938	k	K	2.69638
1937	k	K	2.42346
1936	k	K	1.36623
1935	k	K	1.80507
1934	k	K	1.69121
1933	k	K	2.09687
1932	k	K	1.64453
1931	k	K	1.15513
1930	k	K	0.891155
1929	k	K	1.02
1928	k	K	1.87664
2007	k	M-W	-0.528108
2006	k	M-W	-0.565431
2005	k	M-W	-0.875428
2004	k	M-W	-0.716611
2003	k	M-W	-0.469592
2002	k	M-W	-0.62103
2001	k	M-W	-0.677572
2000	k	M-W	-0.681176
1999	k	M-W	-0.758225
1998	k	M-W	-0.768521
1997	k	M-W	-0.807303
1996	k	M-W	-0.654835
1995	k	M-W	-0.62532
1994	k	M-W	-0.653205
1993	k	M-W	-0.748872
1992	k	M-W	-0.762772
1991	k	M-W	-0.793403
1990	k	M-W	-0.86496
1989	k	M-W	-0.717555
1988	k	M-W	-0.590141
1987	k	M-W	-0.566032
1986	k	M-W	-0.711206
1985	k	M-W	-0.777358
1984	k	M-W	-0.616482
1983	k	M-W	-0.425233
1982	k	M-W	-0.547413
1981	k	M-W	-0.548442
1980	k	M-W	-0.517726
1979	k	M-W	-0.528279
1978	k	M-W	-0.463757
1977	k	M-W	-0.545611
1976	k	M-W	-0.615796
1975	k	M-W	-0.782249
1974	k	M-W	-0.70683
1973	k	M-W	-0.65861
1972	k	M-W	-0.623689
1971	k	M-W	-0.557022
1970	k	M-W	-0.54012
1969	k	M-W	-0.522102
1968	k	M-W	-0.400351
1967	k	M-W	-0.524418
1966	k	M-W	-0.476885
1965	k	M-W	-0.525105
1964	k	M-W	-0.445739
1963	k	M-W	-0.410475
1962	k	M-W	-0.411762
1961	k	M-W	-0.458352
1960	k	M-W	-0.333598
1959	k	M-W	-0.25286
1958	k	M-W	-0.320642
1957	k	M-W	-0.379844
1956	k	M-W	-0.306828
1955	k	M-W	-0.288038
1954	k	M-W	-0.457151
1953	k	M-W	-0.349557
1952	k	M-W	-0.62858
1951	k	M-W	-0.678688
1950	k	M-W	-0.584822
1949	k	M-W	-0.591085
1948	k	M-W	-0.425433
1947	k	M-W	-0.358394
1946	k	M-W	-0.472435
1945	k	M-W	-0.428309
1944	k	M-W	-0.600499
1943	k	M-W	-0.44949
1942	k	M-W	-0.444881
1941	k	M-W	-0.487242
1940	k	M-W	-0.538391
1939	k	M-W	-0.607876
1938	k	M-W	-0.573767
1937	k	M-W	-0.597738
1936	k	M-W	-0.606714
1935	k	M-W	-0.557293
1934	k	M-W	-0.549056
1933	k	M-W	-0.453699
1932	k	M-W	-0.46975
1931	k	M-W	-0.502064
1930	k	M-W	-0.762897
1929	k	M-W	-0.673031
1928	k	M-W	-0.587072
1927	k	M-W	-0.570493
1926	k	M-W	-0.658036
1925	k	M-W	-0.614001
1924	k	M-W	-0.599217
1923	k	M-W	-0.636177
1922	k	M-W	-0.736709
1921	k	M-W	-0.739137
1920	k	M-W	-0.584116
1919	k	M-W	-0.57081
1918	k	M-W	-0.446307
1917	k	M-W	-0.481894
1916	k	M-W	-0.558243
1915	k	M-W	-0.614845
1914	k	M-W	-0.473657
1913	k	M-W	-0.455388
1912	k	M-W	-0.360348
1911	k	M-W	-0.440076
1910	k	M-W	-0.487491
1909	k	M-W	-0.544199
1908	k	M-W	-0.483584
1907	k	M-W	-0.435536
1906	k	M-W	-0.352322
1905	k	M-W	-0.410825
1904	k	M-W	-0.413993
1903	k	M-W	-0.261611
1902	k	M-W	-0.280091
1901	k	M-W	-0.166148
1900	k	M-W	-0.142388
1899	k	M-W	-0.103422
1898	k	M-W	-0.0290788
1897	k	M-W	-0.198779
1896	k	M-W	-0.17398
1895	k	M-W	-0.122386
1894	k	M-W	-0.0913832
